# Supplementary material
Source: MDPI journal article supplement (https://www.mdpi.com/1999-4907/3/4/1157)
Supplement: s1 [file s1]

Supplementary File 1—Discussion Guide

Community Social Capital Workshop Procedures and Process

1. Workshop Rationale

The Community and Forest Service checklists will provide descriptions of many variables that have the potential to contribute to or detract from a community’s social capital, and the Forest Service’s social capital in that community. However, it is essential to hear from a cross-section of community residents regarding their perceptions of social capital. Ideally, a researcher would survey a random sample of community residents, as well as have in-depth conversations or multiple focus groups with community residents. Our rapid assessment approach does not permit this kind of in-depth look at a community, but we still need to provide a forum where a variety of community members can interact and provide their perspectives. The Community Social Capital Workshop is designed to provide such a forum in a way that is both efficient and insightful.

2. Setting up the Workshop

The Community Workshop is a facilitated group discussion that (1) focuses on the resources and actions within a community to solve collective problems; and (2) examines how these resources and actions interact with forest management issues and concerns. The workshop should last about three hours, depending on group size and interest. Desirable venues include facilities such as a community centers, volunteer fire departments, school buildings, chambers of commerce offices, and other such community-based facilities. In some instances, Forest Service offices may be the most available and desirable sites for conducting the workshop.

A detailed agenda for the workshop is provided later, but the content of the workshop is a discussion to examine a past or ongoing event that shows how a community responded to a specific need for collective action. Participants will discuss the event with the assistance of a facilitator. A discussion guide will be used to ensure coverage of key points relevant to understanding community social capital. After the discussion, participants will individually respond to a set of written statements to describe their perceptions of community social capital. A similar discussion and rating will then be used to examine the interaction of the Forest Service with the community. The workshop would conclude with group discussion of the results, what they mean for the community and the agency, and what could happen next.

Implementing the workshop requires attention to the basics of conducting an effective public meeting: a meeting agenda, identifying potential participants, invitations to attend, identifying the appropriate time and place, and other details of meeting logistics. Suggestions about the specifics of implementing the workshop are outlined below.

2.1. Identifying Workshop Participants

The key issues for identifying workshop participants are community scale, the number of participants, and group composition. The size or scale of a community is a general indicator of the potential complexity and diversity of social networks within a social environment. As social networks become larger and more diverse, the identification of persons who are knowledgeable about the broader social environment becomes more problematic. As noted previously, this assessment process is constructed to apply to communities of about 10,000 persons or less. At this scale, it should be possible to identify persons who are knowledgeable about the organization of their community and how it functions.

In some instances, it may be desirable to apply this process to a forest-wide assessment of community and agency social capital. This is likely to yield a more generalized assessment than if applied to one particular community, Ranger District, or group of smaller interconnected communities. Where more generalized findings are useful, then participants may be recruited for a forest-wide assessment of social capital. In this case, it would be necessary to have participants each of the
forest-associated communities.

The number of participants in the workshop or discussion group process should offer the opportunity for every one to make a contribution and exchange ideas. There are some “rules of thumb” suggesting that groups of 8-10 or so persons provide this opportunity, but how people interact and the quality of facilitation will affect the ideal size for productive group discussion. Nonetheless, a group of 8–10 persons is a reasonable starting point for composing a discussion group for the social capital workshop. The discussion can get cumbersome with larger groups, while smaller groups may not be able to represent a broad cross-section of community interests and demographics.

An important characteristic of potential workshop participants is community knowledge. Such knowledge allows participants to contribute understandings about the organization and function of their social environment that offers some insight about social capital. This type of workshop group is not necessarily intended to “represent” the community in some statistical sense. Instead, the intent is to identify potential participants with different perspectives about their community and how it functions. The main components of the agenda are discussion of two scenarios, one focused on a recent or ongoing community challenge, and one focused a recent or upcoming Forest Service action in which the community has a stake and interest. It would not be good if the workshop participants did not have an understanding of either of these discussion topics.

With this in mind, what are the social entities likely to include individuals with this type of knowledge? Depending on community scale and complexity, a more formal or informal approach can be used. An informal approach can use agency knowledge about the community that is supplemented by information from a few key persons with an understanding of their community. A more formal approach is to conduct a community asset or organization inventory or a social network analysis. These approaches use knowledge from agency and community sources to develop an inventory of groups and organizations and how these entities may be connected to one another. This information is a basis for identifying potential participants. In many communities, a good cross-section of knowledgeable residents could be identified using the following categories, and inviting one member from each:

- Public institutions and services such as:
  - Government agencies;
  - Educational institutions;
  - Hospitals;
  - Fire Departments;
  - Libraries;
  - Law enforcement;
- Formal and Informal Organizations and Associations such as:
  - Service clubs (e.g., Lions, Elks, Rotary);
  - Parent-Teacher Organizations;
  - Youth groups (Boy/Girl scouts, soccer, Little League, 4-H Club, *etc*...);
  - Grange;
  - League of Women Voters;
  - Arts Councils;
  - Cultural organizations;
- Religious or Faith Based Entities:
  - Inter-faith councils;
  - Churches, Synagogues, and other specific religious groups;
- Volunteer and Charitable Organizations such as:
  - United Way;
  - Red Cross;
  - Food Banks;
- Business Entities:
  - Chambers of Commerce;
  - Labor unions or organizations;
  - Economic or community development entities;
  - Large employers;
- Event Related Committees or Groups:
  - County Fair Committees;
  - Celebration parades;
  - Community identity celebrations;
- Natural Resource or Forest-associated Organizations or Groups:
  - “Friends of” groups;
  - Hiking or OHV clubs;
  - Environmental groups;
  - Watershed councils;
- The Forest Service:
  - District Ranger;
  - Partnership Coordinator;
  - Community Liaison.

Of course, these categories are only suggestions—an example of how a systematic approach can help to achieve a balanced set of workshop attendees. Each community will be different, so it’s important to start out with a good working knowledge of the community. For example, if there is a sizeable population of community members of a certain ethnic group (such as Hispanics) or demographic group (such as retirees), it would be worthwhile to consider inviting a member of that group. Communities are likely to have particular configurations of public agencies, volunteer groups, business organizations, clubs, associations, and other social entities. An informal approach to identifying these configurations is a reasonable starting point. If this does not yield the participants with the desired community knowledge, then a more formal community inventory or network analysis may be used.

In many smaller communities, an individual may wear many hats and be part of many of the above groups or organizations. These individuals can bring many perspectives to the table so could be valuable participants possessing a great amount of knowledge—but because of their many connections within the community they are likely to have a higher level of social capital and different perspectives than other community members. The key is to know the community and strive for a good cross-section and balance of workshop attendees.

2.2. Workshop Structure and Logistics

A foundation for the workshop is attention to the details of conducting an effective meeting. The Forest Service, other federal agencies, as well as private and education institutions are sources for information about the details of conducting effective meetings, discussion groups, and other forms of agency-public interactions. For example, the USFS Partnership Resources Center and online sources such as the Community Tool Box [1] offer a range of information about the details for organizing and conducting effective meetings. For our purposes, the sections below should be considered a survival guide addressing basic issues such as location, time, the invitation process, agenda, participant roles, facilitation, and meeting logistics. This survival guide briefly discusses each of these topics. The USFS Partnership Resources Center can be consulted for links to more detailed information about the specifics for these types of topics as well as more general information about conducting effective meetings. In many communities, there may be a local “meeting culture” that dictates appropriate times, locations, refreshments, and so on. Be aware of these local customs if they exist!

**Location and Time**. As noted previously, the workshop location may be a community facility that is convenient for participants.

Location issues include:

- Sufficient parking and access;
- Room size and seating configuration for the workshop;
- Lighting, audio/visual, and electrical capabilities;
- Ambient noise level that may influence discussion;
- Travel distance for participants;
- Cost;
- Comfort and aesthetics.

Similarly, the time for convening the workshop should consider the schedules and commitments of participants as well as USFS personnel.

**Invitation Process**. Invitation to the workshop may be via a letter, a telephone call, or preferably, a face-to-face meeting, that explains the purpose of the workshop, the proposed start and ending time, and the location for the meeting. The initial contact should also provide a telephone and email address for a Forest Service contact person if participants have questions. The day before the workshop, participants should be contacted as a reminder about the meeting time and place. It may be desirable to line up a couple of extra participants in case of cancellations.

3. Conducting the Workshop

3.1. Agenda

An agenda establishes the proposed sequence of workshop events and the estimated time allocated for each. The agenda should be prepared in consultation with the meeting facilitator and reviewed with the recorder. Here is a sample agenda for the workshop:

**Welcome and Introductions/icebreaker** (10 minutes; discussed below);

**Meeting Purpose and Agenda** (5 minutes);

**Roles and Ground Rules** (5 minutes; discussed below);

**Community Scenario** (See Appendix A):

Introduction (5 minutes);

Discussion of scenario (30 minutes);

Participants complete Community Social Capital Rating Sheet (10 minutes);

**Break** (15 minutes):

*(note: during the break, either the facilitator or recorder should collect the rating sheets and tally them up on a single master sheet and flip chart, using the instructions at the end of the rating sheets. These will be used during the Workshop Results Summary portion of the workshop. Have a calculator handy!* ***Be sure to keep the individual rating sheets because we will be doing additional analysis later****)*.

**Forest Service Scenario:**

Introduction (5 minutes);

Discussion (30 minutes);

Participants complete Forest Service Social Capital Rating Sheet (10 minutes).

**Break** (15 minutes):

*(note: during the break, either the facilitator or recorder should collect the rating sheets and tally them up on a single master sheet and flip chart, using the instructions at then end of the rating sheets. These will be used during the Workshop Results Summary portion of the workshop Have a calculator handy! Be sure to keep the individual rating sheets because we will be doing additional analysis later)*;

**Workshop Results Summary** (30 minutes):

*This discussion should focus on the two summaries of rating sheets that are portrayed on the flip charts. First show the summary of the Community results. Point out the high scores, low scores, and areas of uncertainty (the tallies of the “neither agree nor disagree” responses) and ask participants for their reactions. Take about 15 minutes, then do the same thing for the Forest Service summary scores. The goal is not to reach consensus, but to explore reasons why people may have had different perceptions and to look at the overall pattern of responses and see whether individuals think they are reasonable. Good note-taking is especially important during this part of the workshop.*

**Closing** (10 minutes; see below).

3.2. Process Issues

Some process and logistics issues require brief discussion. These issues concern setting the tone, roles for the workshop, ground rules, a means for early engagement of participants in the workshop process, and logistics.

**Setting the Tone**. A greeting and focusing attention on a productive meeting is a starting point for the workshop. Either the facilitator or a Forest Service attendee should provide a personal greeting as people enter the workshop location. This creates a welcoming environment and it also offers the opportunity to ask participants to record their presence on a “sign-in” sheet. Either in the welcoming comments when the meeting begins or preferably using a flip chart sheet, it may be useful to list the following principles for the workshop:

- Whoever shows up is the right group of people;.
- Whatever happens is the only thing that could have happened: it is what we make it;
- Start on time;
- End on time.

These four principals are intended to focus participants and prevent speculation about whether the workshop is worthwhile.

**Roles.** There are three primary roles for this workshop: participant, facilitator, and recorder. Participants are the individuals who will contribute to the content of the workshop. The facilitator is responsible for conducting the meeting, including ensuring participants have the opportunity to contribute, reinforcing ground rules, completing the agenda, and ending the meeting on time. The facilitator has a neutral role that is intended to assist participants to contribute and accomplish the workshop purpose. A facilitator may be an experienced community member, Forest Service staff, or someone the agency contracts with to act in this role. The recorder’s role is to use notes, flip charts, or other means appropriate for the workshop to make a record of key points in participant contributions and the content of the discussions. If the facilitator is a Forest Service employee or contractor, it makes sense for the recorder to be a member of the community, provided he or she is comfortable in that role, knows the expectations for the role and the notes, and has some experience taking notes. The discussions may be recorded electronically if equipment is available and the participants consent, but someone should still be taking detailed notes of the discussions and key points.

**Ground Rules.** Ground rules are intended to ensure participants have the opportunity to make contributions to the workshop goal. It is usually desirable for participants to suggest ground rules that meet the needs of the group. However, having some ground rules as a starting point can assist the group to identify preferences for this workshop. There are a variety of common ground-rules for groups including:

- Civility;
- One person talks at a time;
- Don’t interrupt when others are speaking and no side conversations;
- Don’t monopolize the discussion;
- Focus on your experiences and expressing your point of view, not who is right or wrong;
- Refrain from stereotypes or name calling;
- It is all right to disagree, but don’t be disagreeable;
- Leave the guns in the pickup.

Ground rules can be posted throughout the duration of the meeting and facilitators should emphasize the collective responsibility for maintaining them.

**Early Engagement.** The workshop may be composed of individuals who are unacquainted with one another. In these types of situations an “icebreaker” or early engagement task can ease social tension and allow individuals to make an early contribution. This sets the stage for further contributions to the workgroup process. Usually, an icebreaker or early engagement task should have a connection to the meeting purpose. For this workshop an icebreaker could be combined with the
self-introduction as follows: “Please tell us your name, where you are from, and the biggest challenge facing your community?” Similarly, an early engagement task might be, “Please tell us your name, where you are from, and can you also complete this sentence: ‘what I like most about this community is ....’” These types of introductions and opportunities to contribute are straightforward, relatively
non-threatening, and lay a foundation for the workshop scenarios.

**Meeting Logistics.** The details of meeting preparation enable all participants to focus on the work tasks to be completed. Each workshop may have particular challenges to overcome in this regard, but there are some general guidelines to keep in mind:

- Create a checklist for the workshop process that includes items for each phase of this process: participation selection, invitations, site selection, meeting materials and logistics, and
  post-meeting follow-up.
- Ensure supplies for the meetings are on hand. Supplies include flip charts, markers, duct tape, nametags, sign-in sheets, pencils and paper, copies of handouts such as the rating sheets, a calculator (or laptop with that function available), and refreshments as allowed. It is customary in most places to provide refreshments to people voluntarily coming to a three-hour
  meeting—in general, more is better, and better is better!
- Arrive early the day of the workshop to set up the room, including a location for a sign- in sheet, the arrangement of tables in chairs, setting up flip charts, and distributing any materials or supplies.
- For this type of workshop, arranging the room in a rectangle or in a “U” shape is a desirable because it allows participants to talk with one another and exchange ideas.
- As part of the welcome and introductions, locate rest rooms and ask for cell phones to be turned off (sometimes it’s fun to have everyone play their ringtones first).

**Closing, Review, and Follow-up.** A proper meeting closing is as important as a welcoming greeting. The following are steps that can assist with a proper closing:

- Shortly before the scheduled ending time (15-20 minutes or so), inform the workgroup that the ending time is approaching.
- Review the key ideas and any action items that emerged during the workshop.
- Ask for any additional thoughts or ideas that need to be included in the workshop record and ensure those items are recorded.
- Inform participants of the time line for producing the workshop product and the means
  for distribution.
- Identify any follow-up items that need attention by participants and the Forest Service.
- Thank participants for their contributions and encourage communication about any additional issues and concerns that emerge after the workshop. Provide the name of the contact person and a telephone number or email address for additional contributions or questions.
- If people voluntarily want to stay and talk a little longer, it’s nice to accommodate them!

4. Final Thoughts

As stated, this is just a basic survival guide drawn from a large base of information about conducting effective meetings. Attention to these details should enhance the potential for participants to make contributions to identifying community and Forest Service social capital.

The workshop should spur agency and community interest in social capital and its current status and level. It’s only natural for people to want the discussions started at the workshop to continue, and to explore the results more thoroughly. In some instances, it may be desirable to have an additional meeting with workshop participants to present and to review the findings. While this may not be feasible in all circumstances, such a follow-up meeting can act to build social capital by providing the Forest Service and community participants, and perhaps others, with a forum to discuss the findings and what, if any, next steps are desirable.

Appendix A

Scenario 1: Recent Major Community Issue

The scenario for this exercise is chosen by the participants at the workshop after discussing possible topics. Inform the group that we’re interested in learning about how the community responded to a recent major event, crisis, happening, challenge, *etc*. It should be something not directly connected to the Forest Service because that will be the scenario for the second workshop discussion. Say that we’re interested in hearing about the issue and how the community dealt with it. In some communities, there may be a hot issue that’s fresh in everyone’s mind. In other cases, people may need to be led efficiently through the process of agreeing on a scenario (which ideally is one that they are all familiar with) because it could take quite a while to think of the possibilities and then agree on one Discussion Guide (topics to explore during the discussion):

1. **Problem definition** Describe the event, problem, or issue (when began, what was involved). Did people have a common understanding of the problem or issue? Was there an existing plan or agreement and if so did you follow it?
2. **Collective action**. How did people work together to address this issue? Who was involved in addressing the issue? Were lots of different groups or types of people involved or was most of the work done by a few groups or individuals? Who were the community leaders?
3. **Social structure**. Did the existence of exiting groups, organizations or social networks help people to work together to address the issue? Were any new groups formed or did people work through existing ones?
4. **Civic dialogue**. Did the people working together treat each other fairly and show respect for others—was the communication among people civil? Did people from different groups trust each other? How were conflicts and disagreements dealt with?
5. **Infrastructure/other capitals.** Did the community have access to the resources (stuff) needed (such as expertise, equipment, time, money, facilities, existing plans) to address the issue? Did it work with other communities or obtain outside resources successfully if they were needed? What type of information did you need to collect, and how did you get it?
6. **Results.** What were the results? Did the problem get solved or the issue successfully addressed? Did the solutions work for most community members? Did people follow through on their commitments? Would you have done something differently?
7. **Lessons learned.** Will the community be in better or worse shape to address other issues in the future as a result of this experience? Were new networks or groups formed? Is the way you addressed this problem typical of how your community works to solve other problems?

Scenario 2: Recent, Ongoing, or Upcoming Forest or Forest Service-Associated Issue

This scenario is developed before the workshop by the researcher based on familiarity with the community and the Forest. Possible topics for the scenario include wildfires and fuel reduction, fire preparedness, beetle kill, forest planning, travel management, oil and gas development, invasive species management, timber harvest, grazing mgmt, endangered species issues, or wilderness designation. The scenario should consist of a 1 to 2 paragraph description of the Forest Service action involved and its relationship to the community. It may help if the researcher already has the topic in mind when soliciting workshop participants; prospective participant can be asked if this is a good scenario topic, if they’re familiar with it, if they were involved, and related questions. This will help to ensure an active discussion during the workshop that can be used to explore the Forest Service’s social capital in the community. The discussion guide that follows can be shared with workshop participants if desired.

Discussion Guide (topics to explore during the discussion):

**Trust.** Did community residents believe that the Forest Service had the technical expertise to address the resource management issue? Did the Forest Service try to understand the community’s interests and needs, and gather and use any local or traditional knowledge that existed?

**Information and communication.** Did the Forest Service keeps community residents informed about what was going on? How did it do this? Were any special techniques used to inform the community compared to the public as a whole? Was there a point person who community residents could go to for reliable information?

**Collective action.** Did the Forest Service actively involve and engage the community in conducting or monitoring this activity? How ere people from the community involved? Was use made of volunteers and, if so, was it effective?

**Civic dialogue**. Did the Forest Service provide a safe forum to listen to community concerns and expressions of diverse opinions? Did people feel comfortable talking about their issues or opinions? Were meetings or forums held in places appropriate for the community?

**Infrastructure.** Did the Forest Service purchase any equipment or supplies locally (if they were available) in its management actions? Did the Forest Service provides meeting space, equipment or other resources for use by the community to address the issue?

**Results.** Were the results acceptable to the community? Did people in the community understand and/or accept actions taken by the Forest Service even though people might not have preferred them? Did the Forest Service follow through on any commitments made?

**Community integration.** Were community evaluations of the Forest Service’s actions influenced by residents’ perceptions of the degree to which the agency or individual employees are good neighbors and active participants in community affairs, aside from their role as Forest
Service employees?

Supplementary File 2—Rating Sheet

1. Community Social Capital

Based on the group’s discussion of the community scenario, your knowledge of other situations involving how community residents work together, and your knowledge of the community in general, please answer the following questions (Table 1). Please check the box that shows whether you
agree, strongly agree, disagree, strongly disagree, or neither agree/nor disagree with each of the following statements.

**Table 1.** Community social capital rating sheet.

| **Questions** | **Strongly agree** | **Agree** | **Neither agree nor disagree** | **Disagree** | **Strongly disagree** |
| --- | --- | --- | --- | --- | --- |
| 1. People in our community tend to stick to their own organizations or social groups. | ☐ | ☐ | ☐ | ☐ | ☐ |
| 1. Our community has had a difficult time in getting people to volunteer to address community problems or issues. | ☐ | ☐ | ☐ | ☐ | ☐ |
| 1. Our community has active groups and organizations that are always ready to pitch in and help solve community problems. | ☐ | ☐ | ☐ | ☐ | ☐ |
| 1. People feel connected to each other in our community. | ☐ | ☐ | ☐ | ☐ | ☐ |
| 1. Our community has sizeable numbers of newcomers who are still somewhat detached from the community and its activities. | ☐ | ☐ | ☐ | ☐ | ☐ |
| 1. People who live here really have a sense of community. | ☐ | ☐ | ☐ | ☐ | ☐ |
| 1. People from different groups in the community have a difficult time trusting each other. | ☐ | ☐ | ☐ | ☐ | ☐ |
| 1. The community has adequate meeting space that is conducive to working together on problem solving. | ☐ | ☐ | ☐ | ☐ | ☐ |
| 1. Our community has parks, trails, a downtown area, or other features that make it easy for different types of people to get together and interact. | ☐ | ☐ | ☐ | ☐ | ☐ |
| 1. People who could be affected by an issue have one or more reliable ways of learning about it and what’s going on. | ☐ | ☐ | ☐ | ☐ | ☐ |
| 1. Our community has an up-to-date, written plan that describes what we are and where we’re going. | ☐ | ☐ | ☐ | ☐ | ☐ |

**Table 1.** *Cont*.

| **Questions** | **Strongly agree** | **Agree** | **Neither agree nor disagree** | **Disagree** | **Strongly disagree** |
| --- | --- | --- | --- | --- | --- |
| 1. When external resources (funding, expertise, *etc*.) are needed to move forward, people in the community know where to find them and are willing to seek them out. | ☐ | ☐ | ☐ | ☐ | ☐ |
| 1. Community members have the skills, experience, and resources to successfully deal with community problems. | ☐ | ☐ | ☐ | ☐ | ☐ |
| 1. Different types of people work together to address community issues. | ☐ | ☐ | ☐ | ☐ | ☐ |
| 1. People don’t work together well in our community unless there’s a major crisis. | ☐ | ☐ | ☐ | ☐ | ☐ |
| 1. Anyone who might be affected or has an interest in a particular community issue has an opportunity to be heard and participate. | ☐ | ☐ | ☐ | ☐ | ☐ |
| 1. Our community generally relies on a few individuals, groups, or elected officials to get most things done. | ☐ | ☐ | ☐ | ☐ | ☐ |
| 1. Our community has lots of events and activities that encourage different types of people to get involved. | ☐ | ☐ | ☐ | ☐ | ☐ |
| 1. People in the community are willing to invest time, energy, or money in community projects even if they don’t benefit personally. | ☐ | ☐ | ☐ | ☐ | ☐ |
| 1. Community members can air their differences, raise issues, and discuss alternative solutions without feeling attacked. | ☐ | ☐ | ☐ | ☐ | ☐ |
| 1. Community members treat those with differing viewpoints respectfully while working to solve the problem. | ☐ | ☐ | ☐ | ☐ | ☐ |
| 1. When people make commitments to each other while working on community issues, they can be counted on to follow through on those commitments. | ☐ | ☐ | ☐ | ☐ | ☐ |
| 1. The community has had past successes in working through difficult issues so we have a strong foundation for addressing future challenges. | ☐ | ☐ | ☐ | ☐ | ☐ |
| 1. People involved in addressing community issues and solving problems end up feeling satisfied with the results. | ☐ | ☐ | ☐ | ☐ | ☐ |
| 1. Our community is known for its ability to get things done. | ☐ | ☐ | ☐ | ☐ | ☐ |
| 1. All things considered, our community has a high level of social capital. | ☐ | ☐ | ☐ | ☐ | ☐ |

1.1. Instructions for Summarizing Responses:

On the left hand margin, next to the question number, write one of the following numbers based on the response to the question:

Strongly agree = 4;

Agree = 3;

Disagree = 2;

Strongly disagree = 1;

Neither agree nor disagree = U (for uncertain); these will be kept track of separately rather than added together with the other scores

1.2. Except:Question #s 1,2,5,7,15,17 Are Reverse-Scored:

Strongly agree = 1;

Agree = 2;

Disagree = 3;

Strongly disagree = 4.

Then compute the average (mean) response by category:

Social structure: Q 1–7;

Built environment/Infrastructure: Q 8–9;

Communication/Information: Q 10–11;

Human capital: Q 12–13;

Collective action: Q14–19;

Civic dialogue: Q 20–21;

Results: Q 22–25;

Overall social capital: Q 26.

The result will be a single score, ranging from a low of 1 to a high of 4, for each of the 8 categories, with higher scores indicating a set of conditions that facilitate or reflect the building and use of social capital. Lots of U’s indicate mixed perceptions, uncertainty, situational specificity, inconsistency, or other possible reasons for a non-committal response that are worth investigating.

To calculate the average score for each category, add up all of the responses that were numbers for all of the questions in that category (omit U’s) and divide by the number of responses you just added up.

2. Forest Service Social Capital

Based on the group’s discussion of the Forest Service scenario, your knowledge of other situations involving the Forest Service and your community, and your knowledge of the Forest Service in general, please answer the following questions (Table 2). Please check the box that shows whether you
agree, strongly agree, disagree, strongly disagree, or neither agree/nor disagree with each of the following statements.

**Table 2.** Forest service social capital rating sheet.

| **Questions** | **Strongly agree** | **agree** | **Neither agree nor disagree** | **disagree** | **Strongly disagree** |
| --- | --- | --- | --- | --- | --- |
| 1. For the most part, community residents believe that the Forest Service has the technical expertise to address resource management issues. | ☐ | ☐ | ☐ | ☐ | ☐ |
| 1. The community has lots of questions about the adequacy of science and information and how it’s used by the agency to make decisions. | ☐ | ☐ | ☐ | ☐ | ☐ |
| 1. The Forest Service tries to understand our community’s interests and needs and considers them to the extent possible. | ☐ | ☐ | ☐ | ☐ | ☐ |
| 1. The Forest Service is fair and pays attention to all interests. | ☐ | ☐ | ☐ | ☐ | ☐ |
| 1. The FS seeks out local or traditional knowledge and other types of information from the community and works it into its plans or projects. | ☐ | ☐ | ☐ | ☐ | ☐ |
| 1. The Forest Service does not keep community residents informed about what is going on. | ☐ | ☐ | ☐ | ☐ | ☐ |
| 1. There is at least one point person with the Forest Service who community residents go to for reliable information—someone who serves as a bridge to the community. | ☐ | ☐ | ☐ | ☐ | ☐ |
| 1. The Forest Service actively involves and engages the community in its forest management activities. | ☐ | ☐ | ☐ | ☐ | ☐ |
| 1. The Forest Service knows how to use volunteers from the community. | ☐ | ☐ | ☐ | ☐ | ☐ |
| 1. The Forest Service shows respect for the community in its communication and provides a safe forum for expression of diverse opinions. | ☐ | ☐ | ☐ | ☐ | ☐ |
| 1. People in the community understand and/or accept actions taken by the Forest Service even though people might not have preferred them. | ☐ | ☐ | ☐ | ☐ | ☐ |
| 1. When the Forest Service makes a commitment, it can be counted on to follow through with it. | ☐ | ☐ | ☐ | ☐ | ☐ |

**Table 2.** *Cont.*

| **Questions** | **Strongly agree** | **agree** | **Neither agree nor disagree** | **disagree** | **Strongly disagree** |
| --- | --- | --- | --- | --- | --- |
| 1. The agency is an active participant or helps to sponsor community affairs and events. | ☐ | ☐ | ☐ | ☐ | ☐ |
| 1. Forest Service employees are part of many different groups, local organizations, or social networks in the community. | ☐ | ☐ | ☐ | ☐ | ☐ |
| 1. Forest Service employees have many skills that add to the pool of expertise available to address community issues. | ☐ | ☐ | ☐ | ☐ | ☐ |
| 1. Sometimes Forest Service employees are community leaders. | ☐ | ☐ | ☐ | ☐ | ☐ |
| 1. The Forest Service doesn’t seem to purchase equipment and supplies locally even when they are available. | ☐ | ☐ | ☐ | ☐ | ☐ |
| 1. The Forest Service provides meeting space, equipment or other resources for use by the community. | ☐ | ☐ | ☐ | ☐ | ☐ |
| 1. Our local Forest Service office is welcoming and helpful to community residents and visitors. | ☐ | ☐ | ☐ | ☐ | ☐ |
| 1. All things considered, the Forest Service has high levels of social capital in our community. | ☐ | ☐ | ☐ | ☐ | ☐ |

If you have additional comments about Forest Service relationships with the community, please write them here.

2.1. Instructions for Summarizing Responses

On the left hand margin of each individual’s rating sheet, next to the question number, write one of the following numbers based on the response to the question:

Strongly agree = 4;

Agree = 3;

Disagree = 2;

Strongly disagree = 1;

Neither agree nor disagree = U (for uncertain); these will be kept track of separately rather than added together with the other scores

2.2. Except:Question #s 2,6,17 Are Reverse-Scored

Strongly agree = 1;

Agree = 2;

Disagree = 3;

Strongly disagree = 4;

Then compute the average (mean) response by category:

Trust: Q 1–5;

Information and Communication: Q 6–7;

Collective Action: Q 8–9;

Civic Dialogue: Q 10;

Results: Q 11–12;

Community Integration: Q13–16;

Infrastructure: Q 17—19;

Perception of social capital: Q 20.

The result will be a single score, ranging from a low of 1 to a high of 4, for each of the 8 categories, with higher scores indicating a set of conditions that facilitate or reflect the building and use of social capital. Lots of U’s indicate mixed perceptions, uncertainty, situational specificity, inconsistency, or other possible reasons for a non-committal response that are worth investigating.

References and Note

1. The USFS Partnership Resource Center website is located at: http://www.partnership
   resourcecenter.org/resources/tools/index.php; The Community Tool Box website is located at: http://ctb.ku.edu/tools//sub_section_main_1153.htm.
